# Supplementary material
Source: PubMed Central journal article supplement (PMC2423242)
Supplement: supp_M801018200_Suppdata.pdf [file supp_M801018200_Suppdata.pdf]

**Supplement figure S1:** Microphotographs of Vero-dogSLAM cells co-transfected with the constructs specified in figure 2B (**A**), figure 3B (**B**), figure 5B (**C**) and figure 7A (**D**). Roman numerals and construct identifiers correspond to those introduced in the individual figures. Pictures were taken 13-20 hours posttransfection at a magnification of 200X.

**Supplement figure S2:** Quantification of surface expression of F (**A** and **B**) and H (**C**) constructs. Surface biotinylation was employed for all F variants and whole cell imaging was used for H constructs. Values represent averages of at least three independent experiments  $\pm$  SD and are expressed as percentage of surface expression observed for CDV F-ODP (for F constructs) or MV H (for H constructs). Roman numerals and construct identifiers correspond to those introduced in figure 2B (**A**), figure 3B (**B**) and figure 5B (**C**).

Figure S1

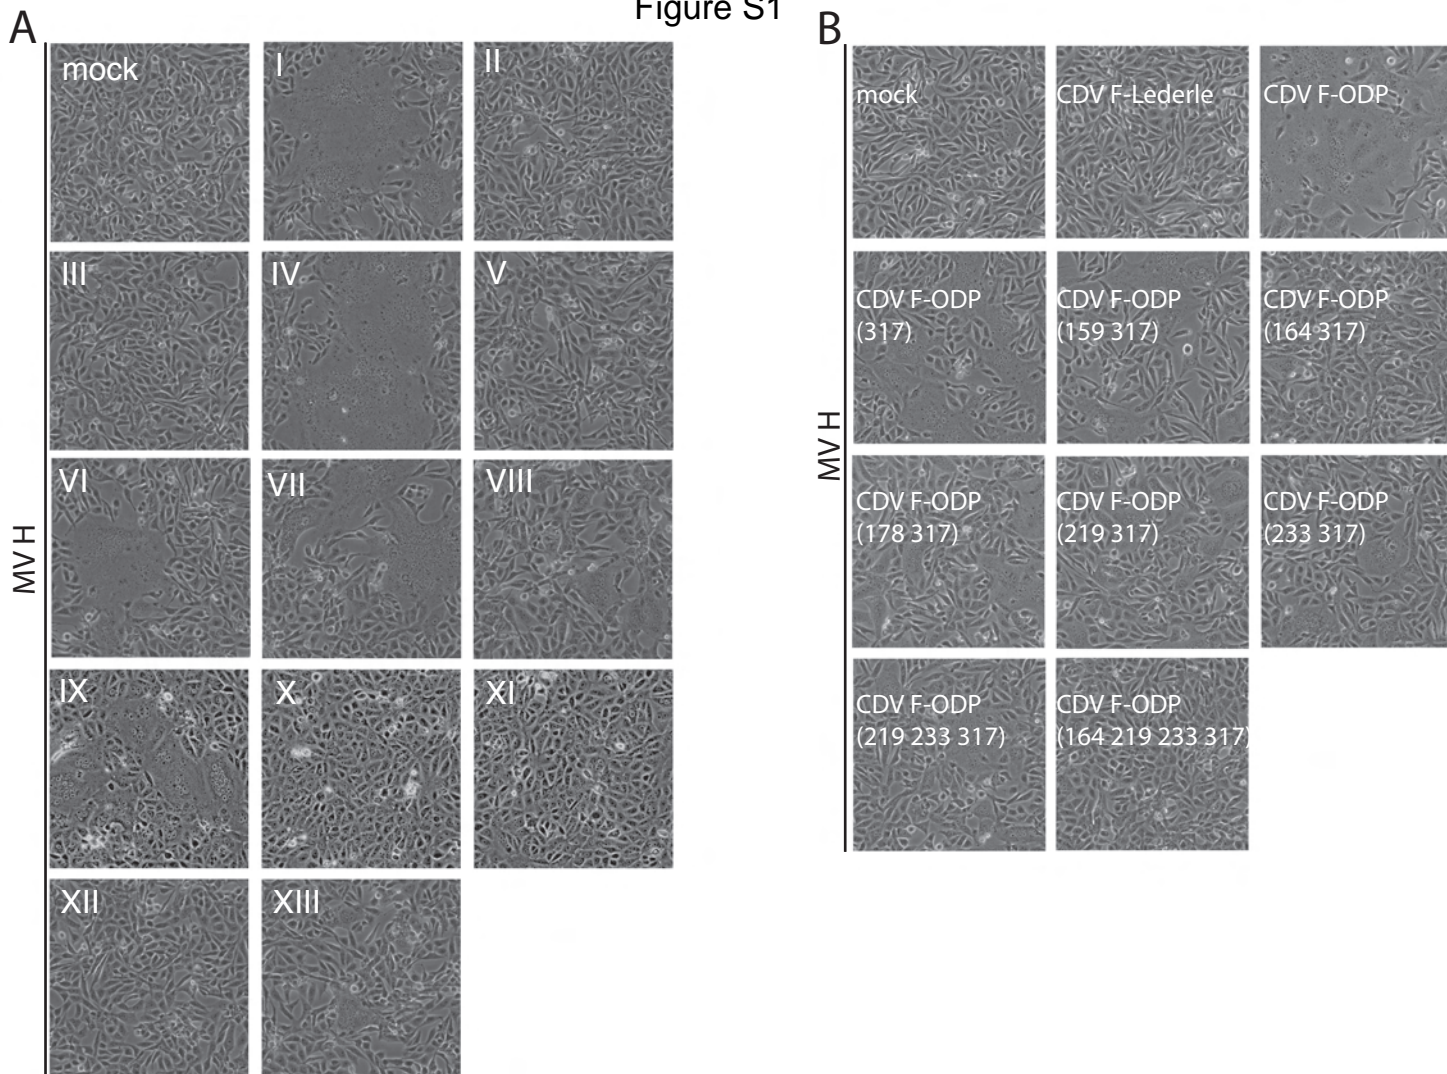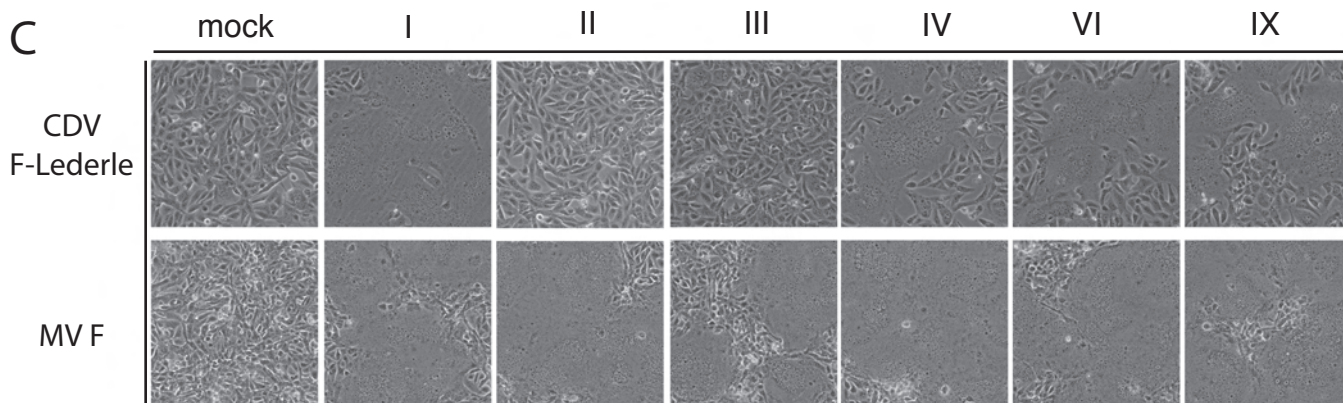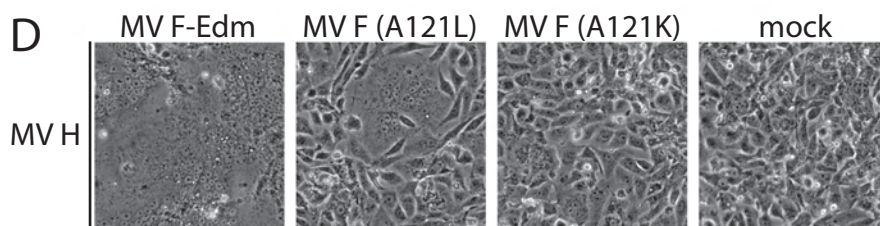

Figure S2

| A    | Surface Expression (%) |  |
|------|------------------------|--|
| I    | 100                    |  |
| II   | 113.6 ± 21.1           |  |
| III  | 113.8 ± 32.5           |  |
| IV   | 86.1 ± 5.0             |  |
| V    | 101.7 ± 37.5           |  |
| VI   | 28.3 ± 15.1            |  |
| VII  | 31.0 ± 4.2             |  |
| VIII | 207.2 ± 58.4           |  |
| IX   | 86.9 ± 4.9             |  |
| X    | 106.9 ± 5.9            |  |
| XI   | 110.1 ± 10.2           |  |
| XII  | 275.4 ± 29.4           |  |
| XIII | 185.7 ± 32.7           |  |
| XIV  | 81.3 ± 14.1            |  |

| B                          | Surface Expression(%) |
|----------------------------|-----------------------|
| CDV F ODP                  | 100                   |
| CDV F Lederle              | 113.6 ± 21.1          |
| CDV F (317)                | 152.6 ± 22.4          |
| CDV F (159, 317)           | 113.9 ± 7.5           |
| CDV F (164, 317)           | 167.6 ± 45.4          |
| CDV F (178, 317)           | 72.4 ± 33.2           |
| CDV F (219, 317)           | 148.1 ± 4.0           |
| CDV F (233, 317)           | 115.2 ± 65.5          |
| CDV F (219, 233, 317)      | 153.4 ± 51.7          |
| CDV F (164, 219, 233, 317) | 148.6 ± 8.3           |

| C    | Surface Expression (%) |
|------|------------------------|
| I    | 124.2 ± 22.0           |
| II   | 100                    |
| III  | 139.5 ± 50.2           |
| IV   | 65.1 ± 8.9             |
| V    | 136.3 ± 72.1           |
| VI   | 87.0 ± 30.0            |
| VII  | 81.2 ± 6.9             |
| VIII | 67.0 ± 2.3             |
| IX   | 69.4 ± 29.8            |
| XI   | 88.4 ± 28.0            |
| XII  | 90.2 ± 15.6            |
| XIII | 99.9 ± 26.2            |
